# Supplementary material
Source: Springer Nature journal article supplement (https://www.springermedizin.de/resource/supplementary/12961_2008_69_MOESM2_ESM.pdf/9571370)

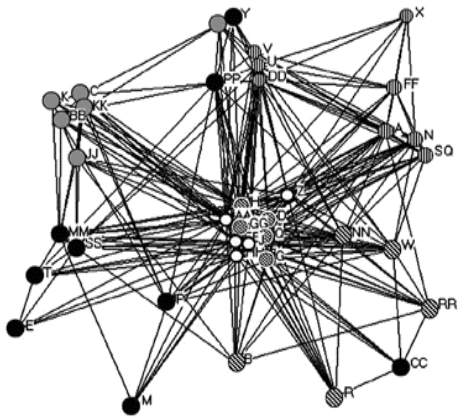

2A

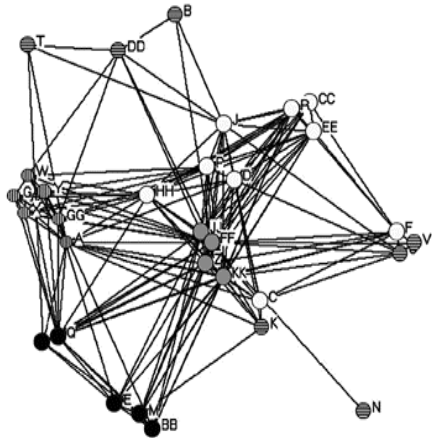

2B

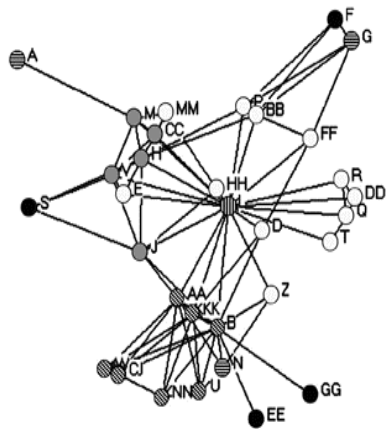

2C

Supplement: MOESM2 [file 9571370]
